# Supplementary material for: IP-10/CXCL10 induction in human pancreatic cancer stroma influences lymphocytes recruitment and correlates with poor survival
Source: PubMed Central journal article supplement (PMC4294325; doi:10.18632/oncotarget.2519), 2014-11-25
Supplement: oncotarget-05-11064-s001.pdf [file oncotarget-05-11064-s001.pdf]

## SUPPLEMENTARY FIGURES AND TABLES

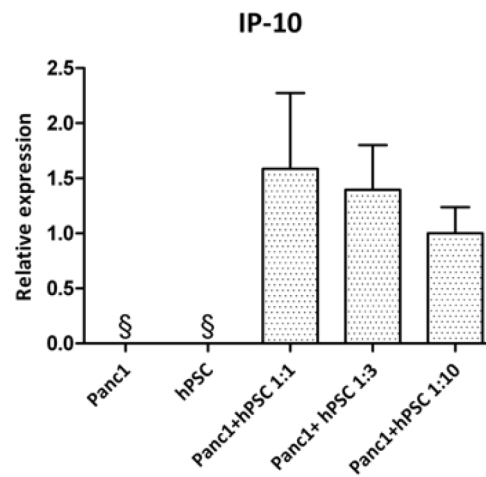

**Supplementary Figure S1: IP-10 secretion by PSCs cocultured with cancer cells compared to monoculture.** Levels of IP-10 in Panc-1 and hPSC monoculture or coculture at the indicated Panc-1:hPSC ratio cocultured for 24 hr was analyzed by ELISA. Relative expression of concentration normalized to Panc-1+hPSC 1:10 ratio ( $n=3$ ). §, not detected.

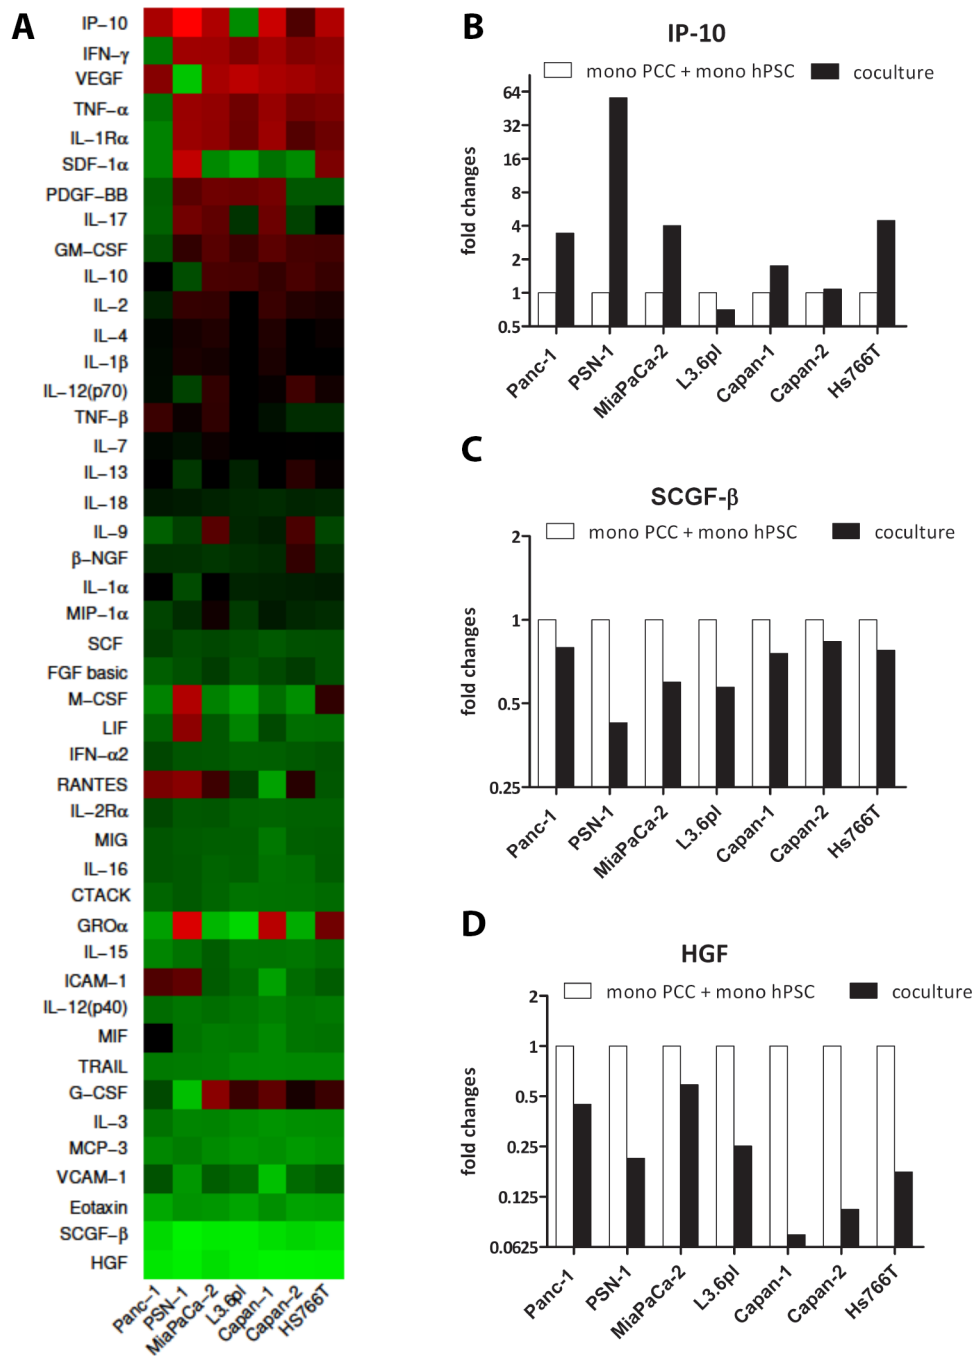

**Supplementary Figure S2: Comparison of different PCC lines cocultured with PSCs.** Expression of cytokine and growth factors was measured using the Human group I 27-Plex cytokines array and the Human group II 23-Plex cytokines array in the cell-free supernatant of PCCs ( $25 \times 10^3$ ) cultured with and without hPSC ( $25 \times 10^3$ ) for 48 hr in 24-well plate (500  $\mu$ L volume). **(A)** Concentration of factors in monoculture (mono PCCs + mono hPSC) was subtracted from coculture for each factor. Values are represented in a heat map with increased intensity color code where red is more than zero and green is below zero ( $n=1$ ). **(B-D)** Relative expression of each coculture normalized to the sum of the respective monocultures for IP-10, SCGF- $\beta$  and HGF ( $n=1$ ).

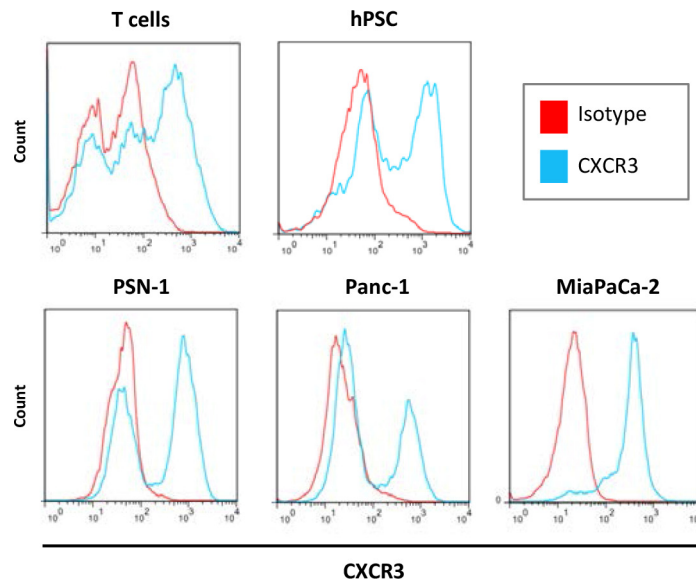

**Supplementary Figure S3: Surface Expression of CXCR3 in PCCs and hPSC.** FACS analysis of CXCR3 surface expression. PCCs and hPSC were cultured in complete media. T cells were used as positive control. Cells were grown until 80% confluent in 6-wells plate and then detached by gentle mechanical scraping. Cells were washed once with PBS and resuspended  $1 \times 10^6$  cells/mL. For each test 100  $\mu$ L of the cell suspension was blocked for 15 min at RT using human IgG (Sigma-Aldrich) at a concentration of 1 mg/mL in PBS 2% FBS. Cells were stained for 20 min at RT by using a directly conjugated anti-human CXCR3-APC antibody (5  $\mu$ L/test; #561732, BD Bioscience) and mouse IgG1,  $\kappa$ -APC as isotype control (5  $\mu$ L/test; #555751, BD Biosciences). After one wash with PBS 2% FBS the cells were resuspended and analyzed using FACS Calibur (BD Biosciences) and data elaborated with FlowJo software (Tree Star). Data are representative of three independent experiments.

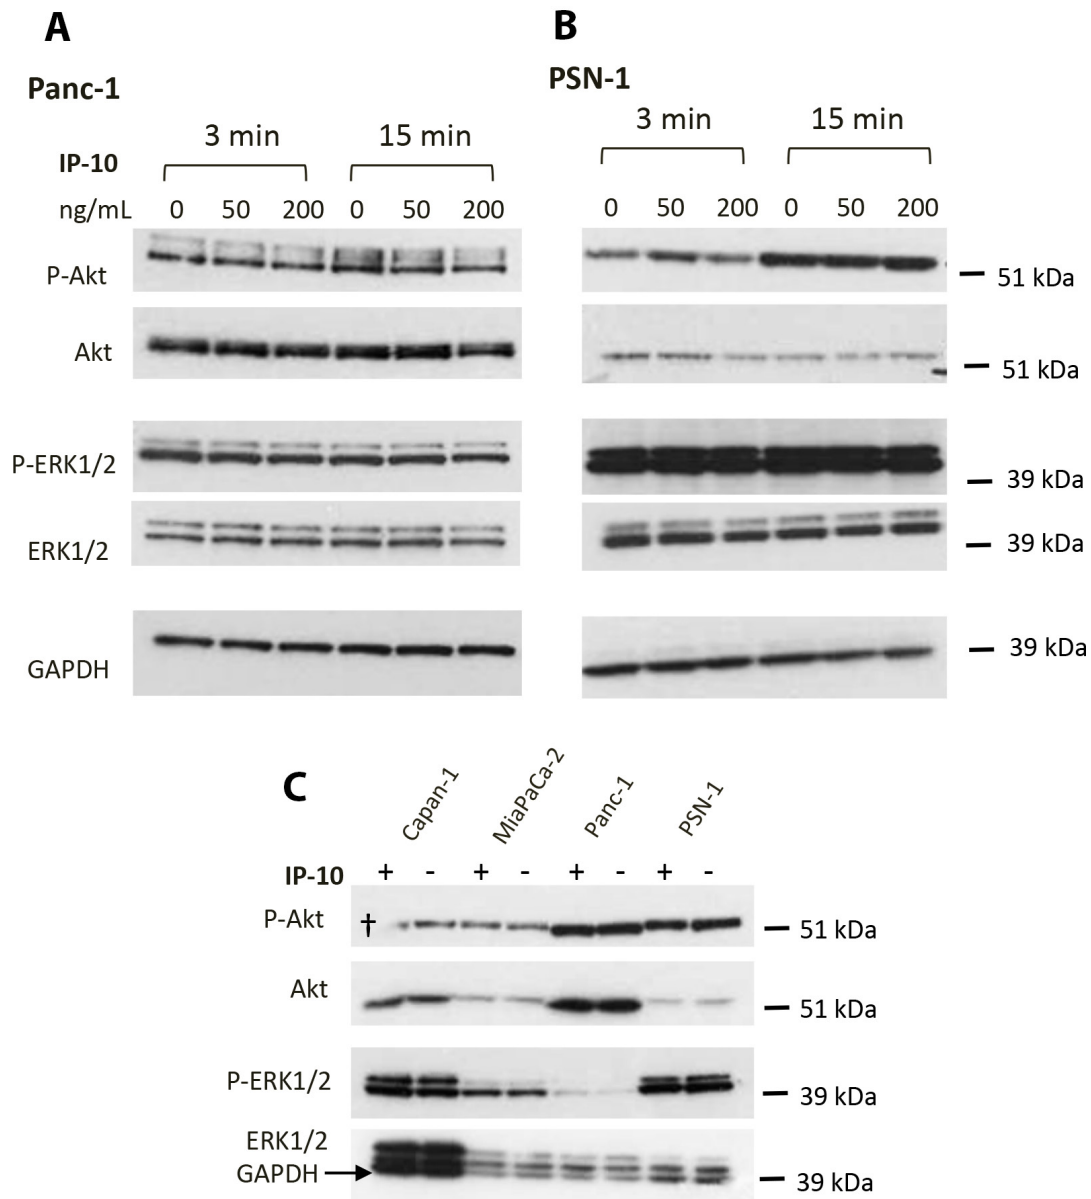

**Supplementary Figure S4: Analysis of P-Akt and P-ERK1/2 levels upon IP-10 stimulation.** Western blot of P-Akt, P-ERK1/2, total Akt and ERK. GAPDH was used as loading control. (A-B) Panc-1 (A) and PSN-1 (B) were stimulated with IP-10 using the concentrations and time indicated. (C) PCC were starved over night in 0.1% FBS media and then exposed to IP-10 (600 ng/ml) for 20 min. †, unspecific missing signal due to membrane damage.

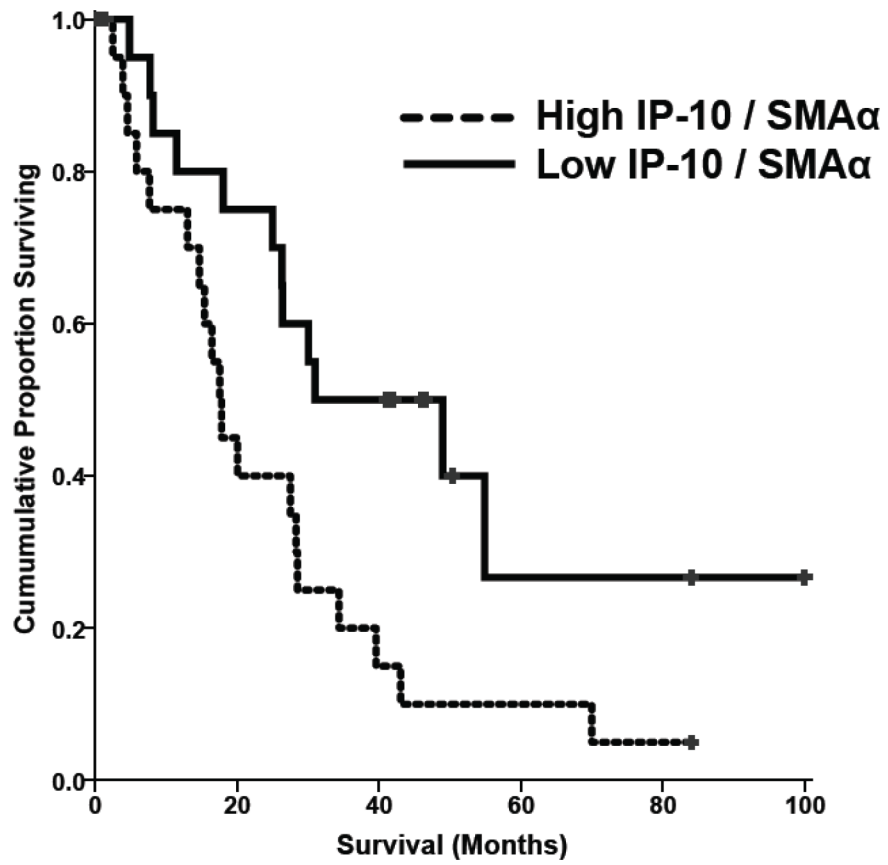

Supplementary Figure S5: Overall survival of patients with pancreatic cancer based on IP-10/ $\alpha$ -SMA gene expression. Kaplan-Meier analyses of patients with resected PDAC stratified by high and low ratio of IP-10/ $\alpha$ -SMA ( $n=48$ ).

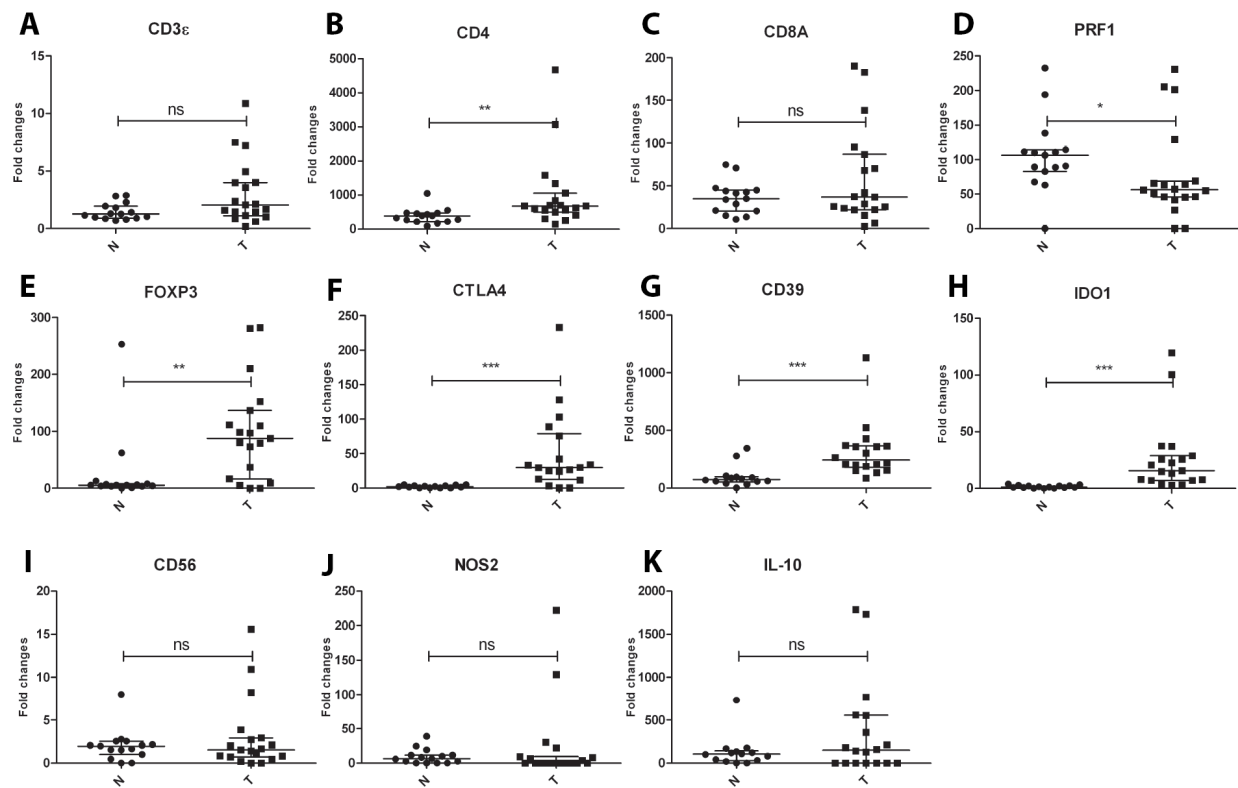

**Supplementary Figure S6: mRNA expression levels of markers for leukocyte subpopulation in PDAC.** (A-K) mRNA levels of CD3 $\epsilon$ , CD4, CD8A, PRF1, CD56, NOS2, FOXP3, CTLA4, CD39, IL-10 and IDO1 in PDAC tumors (T;  $n=19$ ) compared to the para-normal pancreatic tissue (N;  $n=15$ ). Line indicates the median with the interquartile range. Markers were measured by qPCR, normalized to the endogenous GAPDH control and fold changes calculated over the expression levels in a Human Reference Total RNA library. In F, G and K the number of samples analyzed for this factors are 14 for N and 18 for T. Mann Whitney test \*,  $p<0.05$ ; \*\*,  $p<0.001$ ; ns, non-significant.

**A**

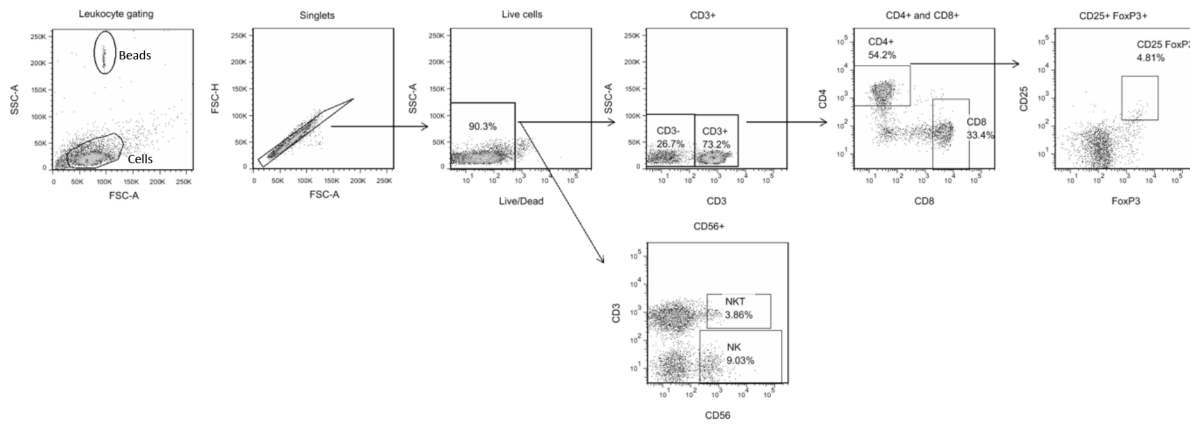

**B**

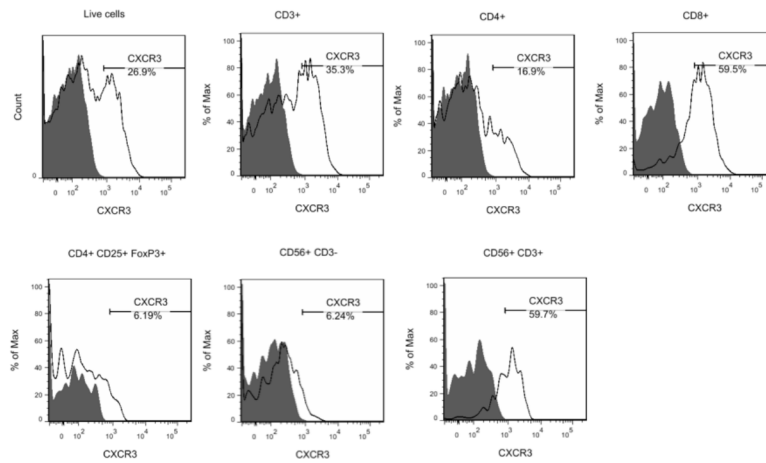

**Supplementary Figure S7: Flow cytometry analysis of PBMC. (A)** Gating strategy used to determine the different leukocytes subpopulation. **(B)** FACS analysis of CXCR3 surface expression in the different subpopulation.

**Supplementary Table S1. List of TaqMan assays**

| Gene                 | TaqMan assay ID                                 |
|----------------------|-------------------------------------------------|
| Human CXCL10 (IP-10) | Hs00171042_m1, FAM <sup>TM</sup> Dye            |
| Human CXCR3          | Hs01847760_s1, FAM <sup>TM</sup> Dye            |
| Human GAPDH          | Hs99999905_m1, FAM <sup>TM</sup> Dye            |
| Human GAPDH          | GAPDH Endogenous Control, VIC <sup>TM</sup> Dye |
| Human CD3E (CD3ε)    | Hs01062241_m1, FAM <sup>TM</sup> Dye            |
| Human CD4            | Hs01058407_m1, FAM <sup>TM</sup> Dye            |
| Human CD8A           | Hs00233520_m1, FAM <sup>TM</sup> Dye            |
| Human NCAM1 (CD56)   | Hs00941830_m1, FAM <sup>TM</sup> Dye            |
| Human PRF1           | Hs00169473_m1, FAM <sup>TM</sup> Dye            |
| Human NOS2           | Hs01075529_m1, FAM <sup>TM</sup> Dye            |
| Human IDO1           | Hs00984148_m1, FAM <sup>TM</sup> Dye            |
| Human FOXP3          | Hs01085834_m1, FAM <sup>TM</sup> Dye            |
| Human CTLA4          | Hs03044418_m1, FAM <sup>TM</sup> Dye            |
| Human ENTPD1 (CD39)  | Hs00969559_m1, FAM <sup>TM</sup> Dye            |
| Human IL-10          | Hs00961622_m1, FAM <sup>TM</sup> Dye            |



**Supplementary Table S2. Concentration of cytokines and growth factors determined with the Human group I 27-Plex cytokines array and the Human group II 23-Plex cytokines array.** Data are expressed as concentration of proteins (pg/mL)  $\pm$  SD after 24 hr of culture ( $n=4$ ). Factors highlighted in bold were significantly increased in monoculture of hPSC compared to MRC5. ND, not detected.

| Analyte                     | Panc-1 Mean $\pm$ SD (pg/mL) |       |      | Panc-1 + hPSC Mean $\pm$ SD (pg/mL) |       |         | hPSC Mean $\pm$ SD (pg/mL) |       |         | Panc-1 + MRC5 Mean $\pm$ SD (pg/mL) |       |         | MRC5 Mean $\pm$ SD (pg/mL) |       |       |
|-----------------------------|------------------------------|-------|------|-------------------------------------|-------|---------|----------------------------|-------|---------|-------------------------------------|-------|---------|----------------------------|-------|-------|
| <b>Interleukins</b>         |                              |       |      |                                     |       |         |                            |       |         |                                     |       |         |                            |       |       |
| IL-8                        | 46.0                         | $\pm$ | 19.2 | 28,101.0                            | $\pm$ | 9,354.2 | 28,101.0                   | $\pm$ | 9,354.2 | 484.4                               | $\pm$ | 108.2   | 463.9                      | $\pm$ | 157.6 |
| IL-6                        | ND                           |       |      | > 31,094.0                          |       |         | > 31,094.0                 |       |         | 1,001.7                             | $\pm$ | 753.0   | 993.0                      | $\pm$ | 769.8 |
| LIF                         | 15.3                         | $\pm$ | 2.7  | 338.1                               | $\pm$ | 42.4    | 344.3                      | $\pm$ | 65.3    | 43.0                                | $\pm$ | 16.7    | 41.6                       | $\pm$ | 12.8  |
| IL-1R $\alpha$              | ND                           |       |      | 223.1                               | $\pm$ | 42.2    | 225.3                      | $\pm$ | 37.6    | 39.3                                | $\pm$ | 15.6    | 36.0                       | $\pm$ | 13.1  |
| IL-15                       | 12.0                         | $\pm$ | 6.2  | 67.4                                | $\pm$ | 8.2     | 67.7                       | $\pm$ | 4.5     | 26.8                                | $\pm$ | 5.1     | 13.9                       | $\pm$ | 0.5   |
| IL-2                        | ND                           |       |      | 16.9                                | $\pm$ | 2.2     | 16.9                       | $\pm$ | 3.0     | 3.9                                 | $\pm$ | 2.9     | 3.6                        | $\pm$ | 2.9   |
| IL-17                       | 9.9                          | $\pm$ | 1.4  | 63.7                                | $\pm$ | 16.7    | 66.1                       | $\pm$ | 17.9    | 14.9                                | $\pm$ | 7.2     | 15.8                       | $\pm$ | 7.0   |
| IL-4                        | ND                           |       |      | 11.3                                | $\pm$ | 1.2     | 10.7                       | $\pm$ | 1.3     | 2.7                                 | $\pm$ | 1.9     | 2.7                        | $\pm$ | 1.8   |
| IL-2R $\alpha$              | 1.5                          | $\pm$ | 1.1  | 94.3                                | $\pm$ | 10.0    | 97.5                       | $\pm$ | 5.0     | 29.3                                | $\pm$ | 17.6    | 33.5                       | $\pm$ | 18.1  |
| IL-16                       | ND                           |       |      | 121.5                               | $\pm$ | 10.3    | 133.0                      | $\pm$ | 4.1     | 53.2                                | $\pm$ | 39.3    | 59.9                       | $\pm$ | 38.3  |
| IL-9                        | 10.1                         | $\pm$ | 2.0  | 43.3                                | $\pm$ | 6.3     | 43.3                       | $\pm$ | 6.9     | 20.7                                | $\pm$ | 5.0     | 19.7                       | $\pm$ | 5.6   |
| IL-12(p40)                  | 11.2                         | $\pm$ | 2.2  | 163.1                               | $\pm$ | 19.4    | 178.8                      | $\pm$ | 13.6    | 73.6                                | $\pm$ | 36.8    | 81.9                       | $\pm$ | 43.7  |
| IL-1a                       | 0.7                          | $\pm$ | 0.3  | 6.0                                 | $\pm$ | 1.6     | 6.0                        | $\pm$ | 1.7     | 2.4                                 | $\pm$ | 2.1     | 2.8                        | $\pm$ | 2.1   |
| IL-3                        | 27.4                         | $\pm$ | 2.9  | 219.6                               | $\pm$ | 20.2    | 228.8                      | $\pm$ | 7.3     | 121.1                               | $\pm$ | 76.7    | 116.5                      | $\pm$ | 73.5  |
| IL-7                        | ND                           |       |      | 12.7                                | $\pm$ | 5.1     | 11.9                       | $\pm$ | 5.0     | 6.4                                 | $\pm$ | 2.9     | 6.5                        | $\pm$ | 3.6   |
| IL-18                       | ND                           |       |      | 15.1                                | $\pm$ | 2.3     | 16.4                       | $\pm$ | 2.1     | 9.2                                 | $\pm$ | 4.0     | 9.6                        | $\pm$ | 3.5   |
| IL-12(p70)                  | 0.7                          | $\pm$ | 0.4  | 14.1                                | $\pm$ | 3.1     | 14.1                       | $\pm$ | 4.1     | 10.9                                | $\pm$ | 0.9     | 10.8                       | $\pm$ | 1.1   |
| IL-10                       | 1.2                          | $\pm$ | 0.9  | 35.3                                | $\pm$ | 10.7    | 35.4                       | $\pm$ | 9.6     | 28.6                                | $\pm$ | 2.7     | 27.4                       | $\pm$ | 2.2   |
| IL-13                       | ND                           |       |      | 14.8                                | $\pm$ | 5.7     | 16.1                       | $\pm$ | 8.0     | 13.3                                | $\pm$ | 3.9     | 14.5                       | $\pm$ | 5.9   |
| IL-1 $\beta$                | ND                           |       |      | 6.8                                 | $\pm$ | 0.4     | 6.9                        | $\pm$ | 0.7     | ND                                  |       |         | ND                         |       |       |
| IL-5                        | ND                           |       |      | ND                                  |       |         | ND                         |       |         | ND                                  |       |         | ND                         |       |       |
| <b>Chemokines/monokines</b> |                              |       |      |                                     |       |         |                            |       |         |                                     |       |         |                            |       |       |
| GRO $\alpha$                | 127.4                        | $\pm$ | 57.5 | 13,754.3                            | $\pm$ | 7,216.0 | 13,358.4                   | $\pm$ | 7,719.6 | 177.8                               | $\pm$ | 69.4    | 129.2                      | $\pm$ | 58.3  |
| Eotaxin                     | 57.1                         | $\pm$ | 14.4 | 5,999.2                             | $\pm$ | 4,106.9 | 6,037.3                    | $\pm$ | 4,086.3 | 136.0                               | $\pm$ | 29.4    | 130.6                      | $\pm$ | 45.6  |
| SDF-1 $\alpha$              | 49.6                         | $\pm$ | 30.3 | 3,208.7                             | $\pm$ | 1,368.8 | 3,056.3                    | $\pm$ | 752.4   | 126.4                               | $\pm$ | 37.2    | 80.6                       | $\pm$ | 25.6  |
| IP-10                       | 43.7                         | $\pm$ | 32.9 | 16,472.9                            | $\pm$ | 2,379.3 | 2,930.1                    | $\pm$ | 1,608.6 | 2,374.6                             | $\pm$ | 1,161.5 | 337.0                      | $\pm$ | 76.8  |
| MCP-3                       | ND                           |       |      | 1,020.5                             | $\pm$ | 468.9   | 988.8                      | $\pm$ | 415.8   | 149.4                               | $\pm$ | 73.2    | 165.0                      | $\pm$ | 82.0  |
| MIG                         | ND                           |       |      | 30.6                                | $\pm$ | 5.5     | 34.1                       | $\pm$ | 2.8     | 18.2                                | $\pm$ | 9.3     | 21.2                       | $\pm$ | 11.2  |
| RANTES                      | 25.5                         | $\pm$ | 5.7  | 295.9                               | $\pm$ | 20.8    | 158.9                      | $\pm$ | 3.9     | 71.3                                | $\pm$ | 17.1    | 46.8                       | $\pm$ | 23.5  |
| MIP-1 $\alpha$              | 5.8                          | $\pm$ | 0.2  | 23.6                                | $\pm$ | 1.1     | 23.1                       | $\pm$ | 1.3     | 10.2                                | $\pm$ | 2.1     | 10.0                       | $\pm$ | 2.8   |
| MIF                         | 37.0                         | $\pm$ | 15.3 | 409.8                               | $\pm$ | 43.9    | 426.4                      | $\pm$ | 50.7    | 244.8                               | $\pm$ | 128.5   | 245.0                      | $\pm$ | 122.8 |
| CTACK                       | ND                           |       |      | 246.4                               | $\pm$ | 62.6    | 259.3                      | $\pm$ | 67.9    | 170.7                               | $\pm$ | 103.1   | 170.0                      | $\pm$ | 100.3 |
| MCP-1                       | >2,288.8                     |       |      | >4,842.5                            |       |         | >6,413.8                   |       |         | >4,781.3                            |       |         | >1,725.1                   |       |       |
| MIP-1 $\beta$               | 19.5                         | $\pm$ | 8.2  | 29.6                                | $\pm$ | 2.0     | 27.3                       | $\pm$ | 9.5     | ND                                  |       |         | 18.4                       | $\pm$ | 0.4   |

(Continued)

| <b>Inflammatory cytokines</b> |      |   |      |          |   |         |          |   |         |          |   |          |          |   |          |
|-------------------------------|------|---|------|----------|---|---------|----------|---|---------|----------|---|----------|----------|---|----------|
| IFN- $\gamma$                 | 14.6 | ± | 3.4  | 2,462.7  | ± | 312.0   | 2,390.0  | ± | 243.4   | 342.5    | ± | 260.6    | 345.8    | ± | 274.9    |
| TNF- $\alpha$                 | 2.0  | ± | 0.8  | 354.2    | ± | 32.6    | 340.9    | ± | 27.0    | 73.4     | ± | 48.6     | 73.6     | ± | 54.0     |
| TNF- $\beta$                  | 1.9  | ± | 0.2  | 8.1      | ± | 3.1     | 8.4      | ± | 3.2     | 5.1      | ± | 5.5      | 4.9      | ± | 5.2      |
| IFN- $\alpha$ 2               | ND   |   |      | 62.7     | ± | 4.6     | 65.9     | ± | 4.4     | 39.0     | ± | 17.4     | 40.9     | ± | 17.1     |
| <b>Growth factors</b>         |      |   |      |          |   |         |          |   |         |          |   |          |          |   |          |
| M-CSF                         | 65.6 | ± | 72.4 | 3,100.8  | ± | 2,898.5 | 3,431.2  | ± | 3,287.6 | 250.7    | ± | 256.9    | 234.3    | ± | 243.0    |
| G-CSF                         | 1.2  | ± | 1.0  | 319.2    | ± | 88.3    | 311.8    | ± | 86.9    | 45.6     | ± | 36.3     | 43.4     | ± | 35.8     |
| PDGF-BB                       | 3.4  | ± | 2.6  | 97.2     | ± | 5.0     | 95.6     | ± | 5.0     | 15.8     | ± | 5.4      | 14.2     | ± | 8.6      |
| GM-CSF                        | ND   |   |      | 127.8    | ± | 17.6    | 128.2    | ± | 11.6    | 24.7     | ± | 18.0     | 23.9     | ± | 16.3     |
| HGF                           | 6.3  | ± | 5.0  | 9,127.0  | ± | 1,559.5 | 11,295.2 | ± | 1,905.3 | 4,225.2  | ± | 2,927.7  | 5,151.8  | ± | 3,620.5  |
| FGF basic                     | 18.3 | ± | 1.0  | 44.9     | ± | 12.4    | 44.0     | ± | 4.5     | 20.5     | ± | 4.3      | 20.4     | ± | 3.2      |
| $\beta$ -NGF                  | ND   |   |      | 24.8     | ± | 9.9     | 27.1     | ± | 10.5    | 14.0     | ± | 3.9      | 14.8     | ± | 3.9      |
| SCF                           | ND   |   |      | 54.4     | ± | 4.1     | 57.7     | ± | 4.2     | 37.5     | ± | 7.7      | 38.3     | ± | 7.9      |
| VEGF                          | 29.6 | ± | 18.0 | 2,036.3  | ± | 570.7   | 1,881.8  | ± | 885.4   | 1,406.0  | ± | 161.8    | 1,355.0  | ± | 170.7    |
| SCGF- $\beta$                 | 98.0 | ± | 63.6 | 29,372.6 | ± | 7,969.0 | 28,767.0 | ± | 9,709.6 | 26,426.8 | ± | 19,274.0 | 27,879.3 | ± | 20,505.3 |
| <b>Apoptosis Mediator</b>     |      |   |      |          |   |         |          |   |         |          |   |          |          |   |          |
| TRAIL                         | 6.4  | ± | 0.0  | 225.2    | ± | 21.8    | 248.4    | ± | 12.7    | 83.3     | ± | 75.3     | 91.8     | ± | 75.4     |
| <b>Adhesion molecules</b>     |      |   |      |          |   |         |          |   |         |          |   |          |          |   |          |
| ICAM-1                        | 41.5 | ± | 30.7 | 164.0    | ± | 67.2    | 120.7    | ± | 28.7    | 76.9     | ± | 43.6     | 35.3     | ± | 12.4     |
| VCAM-1                        | 0.6  | ± | 0.0  | 87.0     | ± | 3.3     | 93.2     | ± | 7.0     | 45.5     | ± | 20.5     | 48.6     | ± | 21.2     |

**Supplementary Table S3. Clinical characteristics of PDAC patients in which the gene expression analysis was performed**

| Characteristic                      | 48 patient cohort |
|-------------------------------------|-------------------|
| Demographic                         |                   |
| Gender (F: M)                       | 19/ 29            |
| Age ( $\leq 65$ / $> 65$ yrs)       | 25/ 23            |
| Pathological                        |                   |
| Tumor stage (T2 / T3)               | 4/ 44             |
| Lymph node metastasis (no / yes)    | 8/ 40             |
| Tumor size ( $\leq 30$ / $> 30$ mm) | 28/ 20            |
| Tumor grade (low / high)            | 32/ 16            |
| Perineural invasion (no / yes)      | 3/ 45             |
| Venous invasion (no / yes)          | 15/ 33            |
| Lymphatic invasion (no / yes)       | 31/ 17            |
| Operative, treatment and outcome    |                   |
| Vascular resection (no / yes)       | 36/ 12            |
| Resection margin status (R0 / R1)   | 10/ 38            |
| Adjuvant therapy (no / yes)         | 20/ 28            |
| Survival (months) (median / mean)   | 18.0/24.9         |
